# Supplementary material for: TBX15/miR-152/KIF2C pathway regulates breast cancer doxorubicin resistance via promoting PKM2 ubiquitination
Source: PubMed Central journal article supplement (PMC8522147; doi:10.1186/s12935-021-02235-w), 2021-10-18
Supplement: 12935_2021_2235_MOESM1_ESM.pdf [file 12935_2021_2235_MOESM1_ESM.pdf]

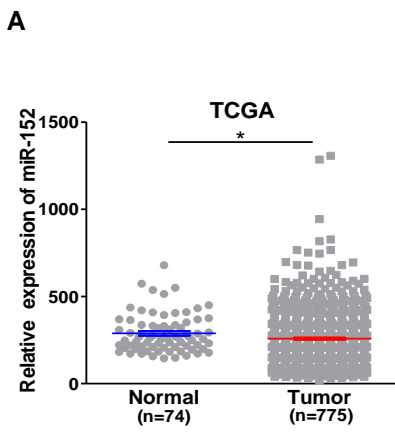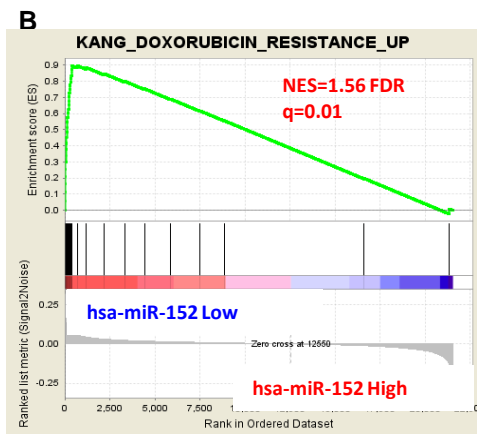

Jiang et al., Figure S1
