# Supplementary material for: TBX15/miR-152/KIF2C pathway regulates breast cancer doxorubicin resistance via promoting PKM2 ubiquitination
Source: PubMed Central journal article supplement (PMC8522147; doi:10.1186/s12935-021-02235-w), 2021-10-18
Supplement: 12935_2021_2235_MOESM2_ESM.pdf [file 12935_2021_2235_MOESM2_ESM.pdf]

**A**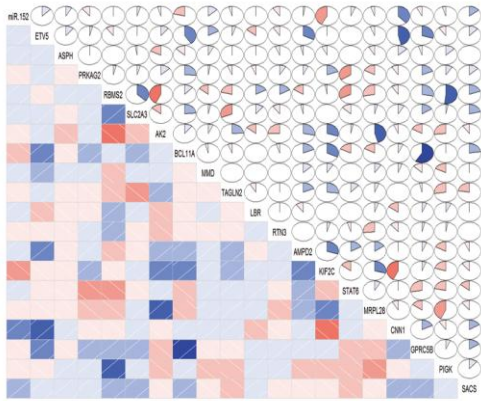**B**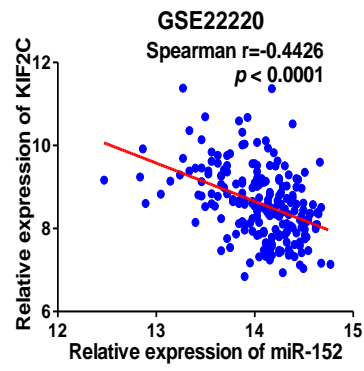**C**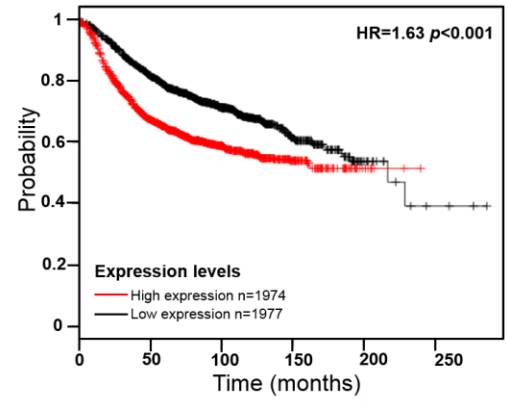**D****Domains and Repeats**

| Feature key | Position(s) | Description | Graphical view | Length |
|-------------|-------------|-------------|----------------|--------|
| Region      | 2 - 254     | Globular    |                | 253    |

| Feature key | Position(s) | Description   | Graphical view | Length |
|-------------|-------------|---------------|----------------|--------|
| Domain      | 258 - 588   | Kinesin motor |                | 331    |

| Feature key | Position(s) | Description | Graphical view | Length |
|-------------|-------------|-------------|----------------|--------|
| Coiled coil | 618 - 658   |             |                | 41     |

Jiang et al., Figure S2
